# Supplementary material
Source: PubMed Central journal article supplement (PMC3859435)

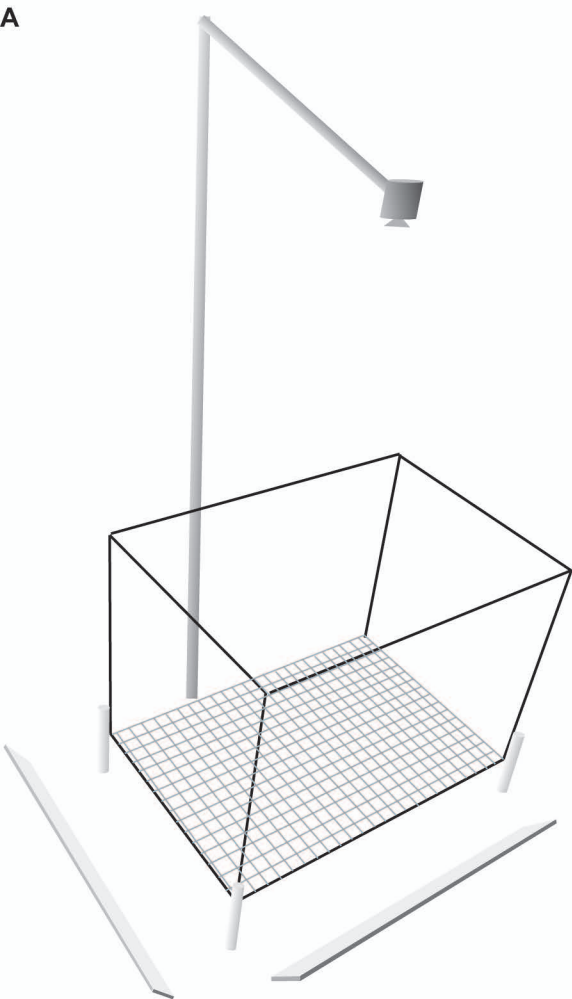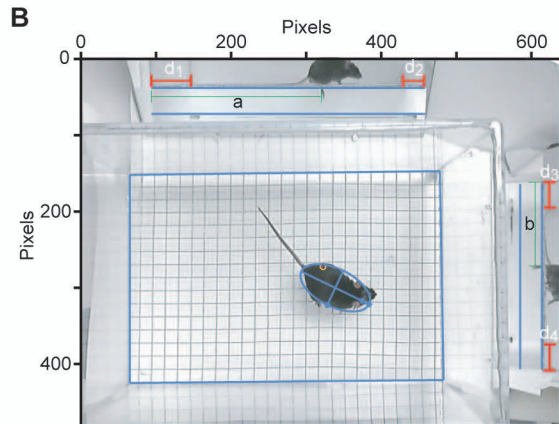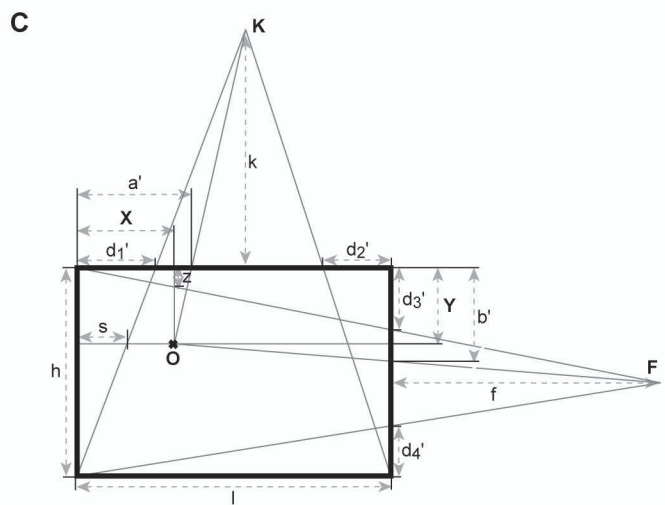

Supplement: NIHMS532576-supplement-02.pdf [file NIHMS532576-supplement-02.pdf]

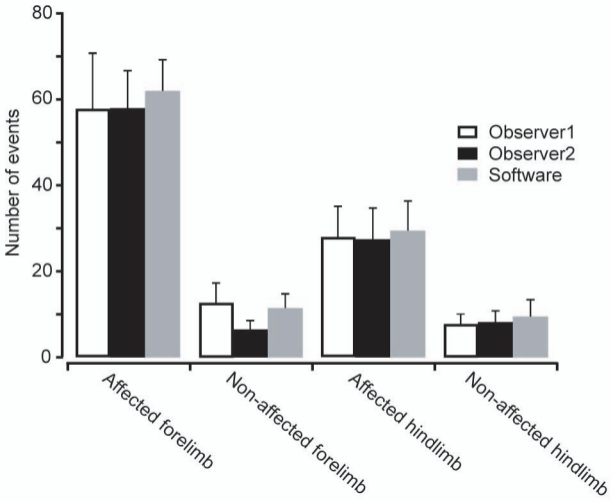

Supplement: NIHMS532576-supplement-03.pdf [file NIHMS532576-supplement-03.pdf]
